# Supplementary material for: Dammarane-Type Triterpenoid from the Stem Bark of Aglaia elliptica (Meliaceae) and Its Cytotoxic Activities
Source: MDPI journal article supplement (doi:10.3390/molecules27196757), 2022-10-10

## Supplementary Material

### Dammarane-Type Triterpenoids from the Stem Bark of *Aglaia elliptica* (Meliaceae) and Their Cytotoxic Activities

Kindi Farabi <sup>1</sup>, Desi Harneti <sup>1</sup>, Darwati Darwati <sup>1</sup>, Tri Mayanti <sup>1</sup>, Nurlelasari Nurlelasari <sup>1</sup>, Rani Maharani <sup>1,2</sup>, Aprilia Permata Sari<sup>1</sup>, Tati Herlina<sup>1</sup>, Ace Tatang Hidayat<sup>1</sup>, Unang Supratman <sup>1,2,\*</sup>, Sofa Fajriah <sup>3</sup>, Mohamad Nurul Azmi <sup>4</sup>, Yoshihito Shiono <sup>5</sup>

#### Affiliation

<sup>1</sup>Department of Chemistry, Faculty of Mathematics and Natural Sciences, Universitas Padjadjaran, Jatinangor, 45363, Indonesia

<sup>2</sup>Central Laboratory of Universitas Padjadjaran, Jatinangor, 45363, Indonesia

<sup>3</sup>Research Center for Chemistry, National Research and Innovation Agency (BRIN) Kawasan PUSPIPTEK Serpong Tangerang Selatan, 15314, Banten, Indonesia

<sup>4</sup>School of Chemical Sciences, Universiti Sains Malaysia, 11800 Minden, Penang, Malaysia

<sup>5</sup>Department of Food, Life, and Environmental Science, Faculty of Agriculture, Yamagata University, Tsuruoka, Yamagata, 997-8555, Japan

\*Correspondence: unang.supratman@unpad.ac.id; Tel.: +62 22 7794391

## Contents

**Figure S1.** HRTOFMS Spectrum of **1**.

**Figure S2.** FTIR Spectrum of **1**.

**Figure S3.**  $^1\text{H}$ -NMR Spectrum of **1** (500 MHz in  $\text{CDCl}_3$ ).

**Figure S4.**  $^{13}\text{C}$ -NMR Spectrum of **1** (125 MHz in  $\text{CDCl}_3$ ).

**Figure S5.** DEPT-135° Spectrum of **1** (125 MHz in  $\text{CDCl}_3$ ).

**Figure S6.** HMQC Spectrum of **1**.

**Figure S7.** HMBC Spectrum of **1**.

**Figure S8.**  $^1\text{H}$ - $^1\text{H}$ -COSY Spectrum of **1**.

**Figure S9.** NOESY Spectrum of **1**.

**Figure S10.** HRTOFMS Spectrum of **2**.

**Figure S11.** FTIR Spectrum of **2**.

**Figure S12.**  $^1\text{H}$ -NMR Spectrum of **2** (500 MHz in  $\text{CDCl}_3$ ).

**Figure S13.**  $^{13}\text{C}$ -NMR Spectrum of **2** (125 MHz in  $\text{CDCl}_3$ ).

**Figure S14.** DEPT-135° Spectrum of **2** (125 MHz in  $\text{CDCl}_3$ ).

**Figure S15.** HMQC Spectrum of **2**.

**Figure S16.** HMBC Spectrum of **2**.

**Figure S17.**  $^1\text{H}$ - $^1\text{H}$ -COSY Spectrum of **2**.

**Figure S18.** NOESY Spectrum of **2**.

**Figure S19.** Results of cytotoxic activity of **1** against MCF-7 cell line.

**Figure S20.** Results of cytotoxic activity of **2** against MCF-7 cell line.

**Figure S21.** Results of cytotoxic activity of **3** against MCF-7 cell line.

**Figure S22.** Results of cytotoxic activity of **4** against MCF-7 cell line.

**Figure S23.** Results of cytotoxic activity of **5** against MCF-7 cell line.

**Figure S24.** Results of cytotoxic activity of **1** against B16-F10 cell line.

**Figure S25.** Results of cytotoxic activity of **2** against B16-F10 cell line.

**Figure S26.** Results of cytotoxic activity of **3** against B16-F10 cell line.

**Figure S27.** Results of cytotoxic activity of **4** against B16-F10 cell line.

**Figure S28.** Results of cytotoxic activity of **5** against B16-F10 cell line.

**Figure S1.** HRTOFMS Spectrum of **1**.

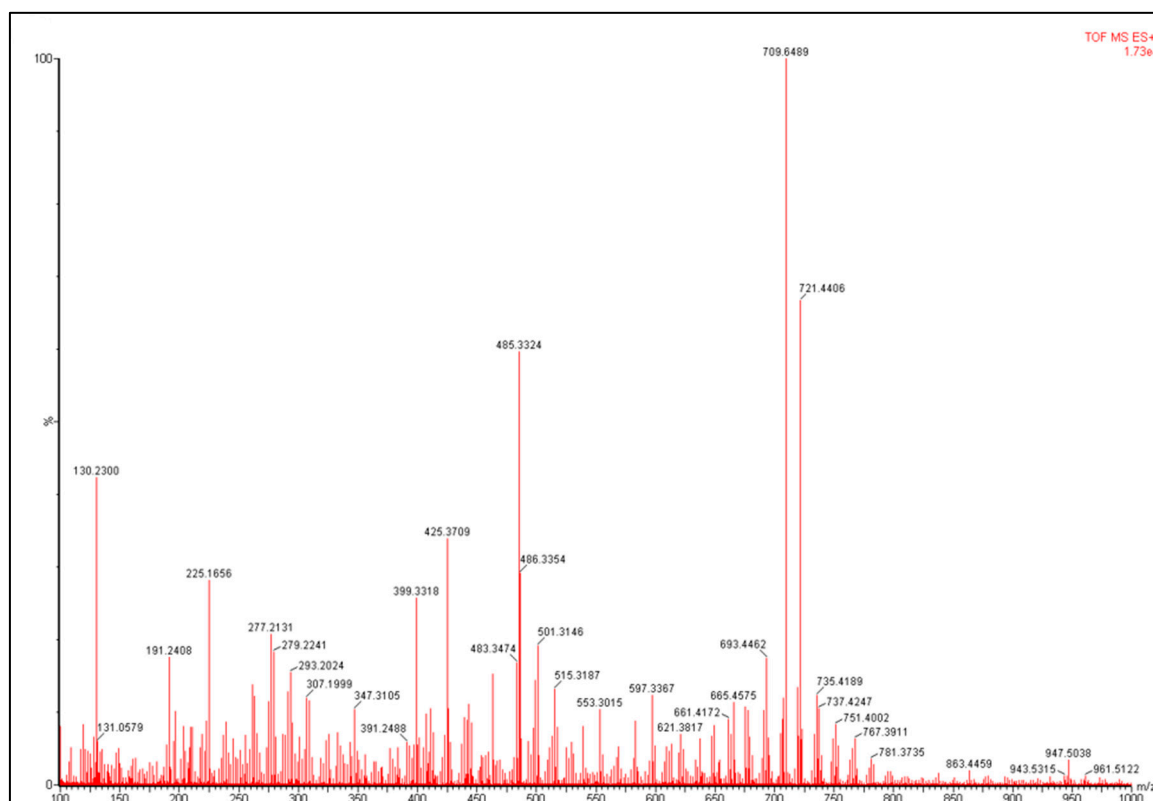

**Figure S2.** FTIR Spectrum of **1**.

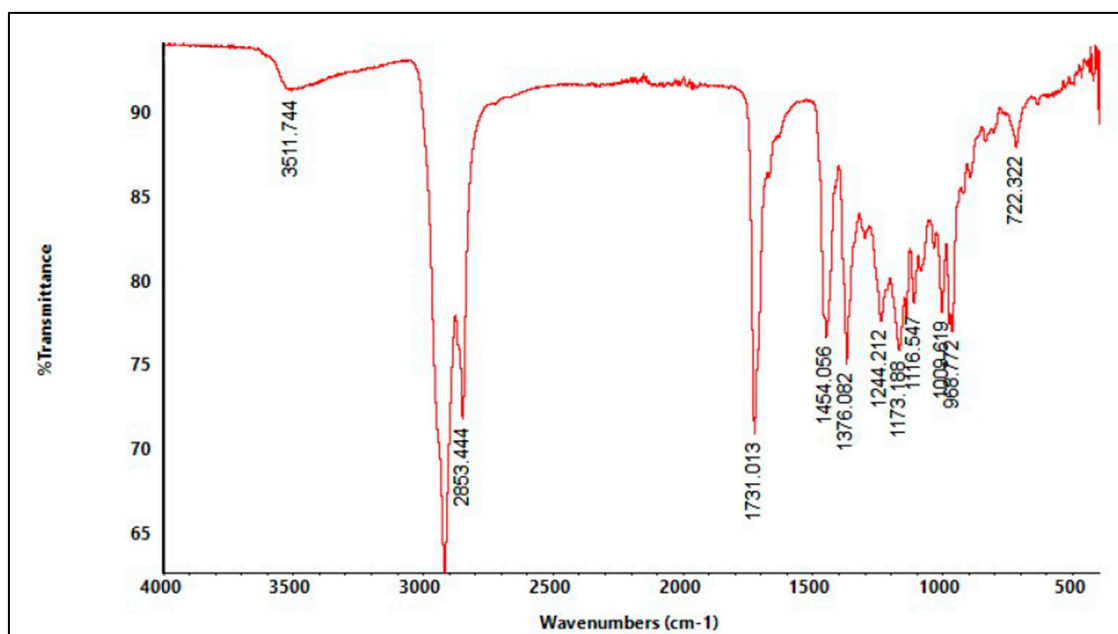



**Figure S3.**  $^1\text{H}$ -NMR Spectrum of **1** (500 MHz in  $\text{CDCl}_3$ ).

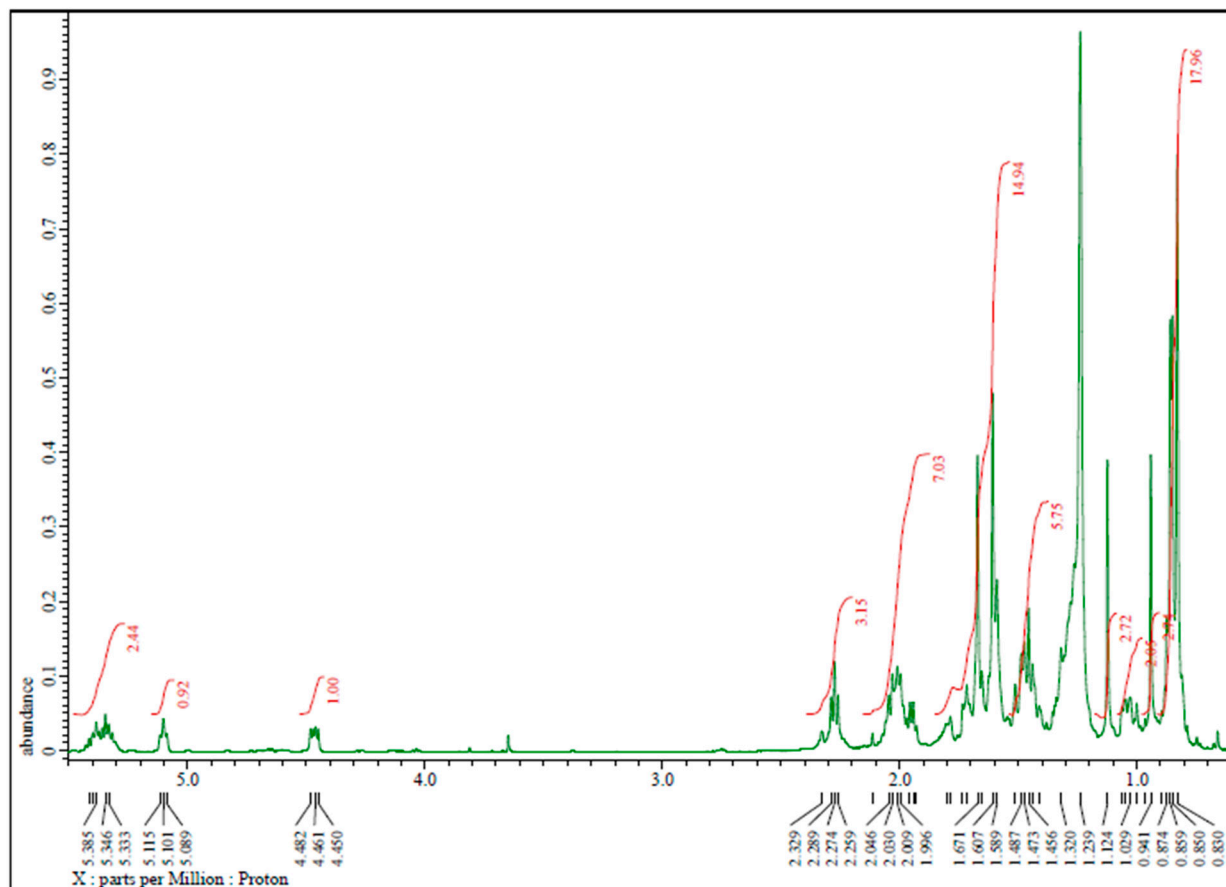

**Figure S4.**  $^{13}\text{C}$ -NMR Spectrum of **1** (125 MHz in  $\text{CDCl}_3$ ).

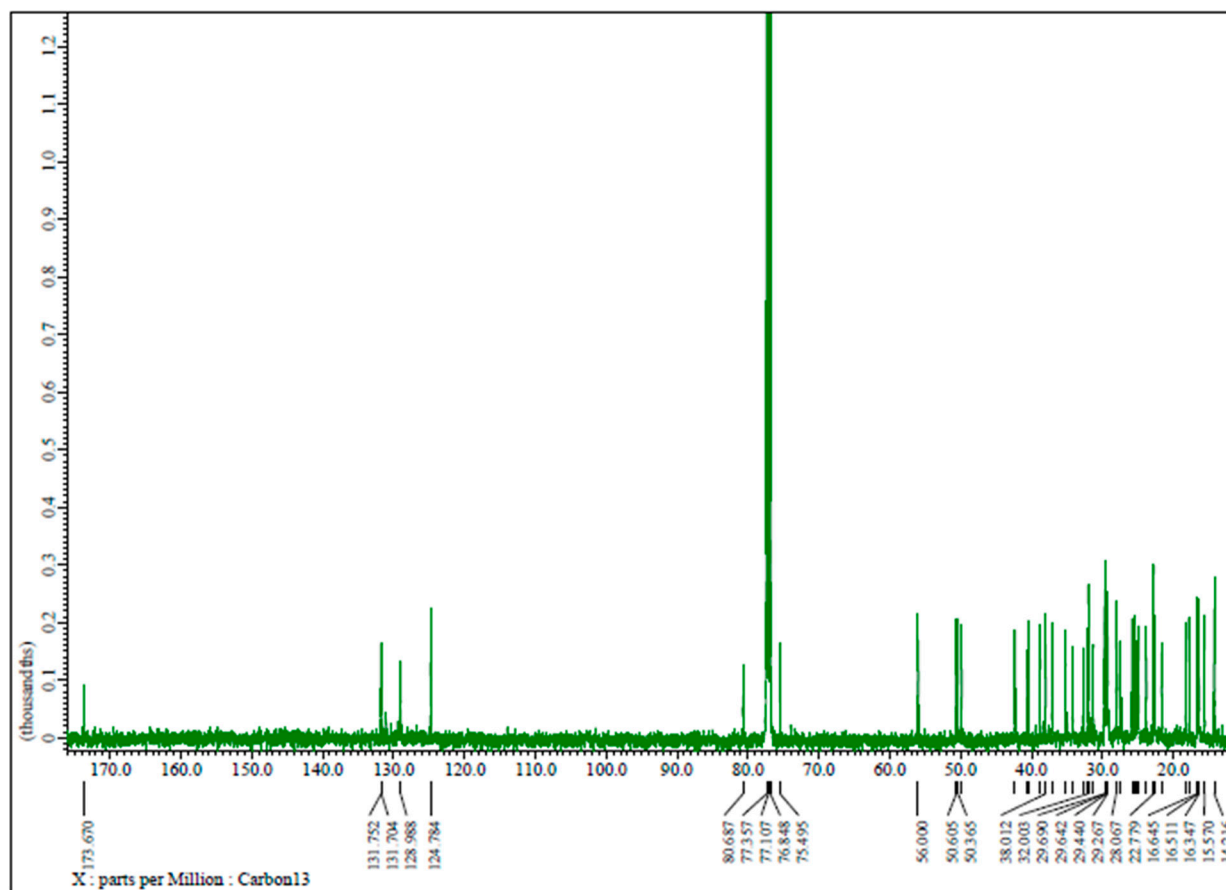

**Figure S5.** DEPT-135° Spectrum of **1** (125 MHz in CDCl<sub>3</sub>).

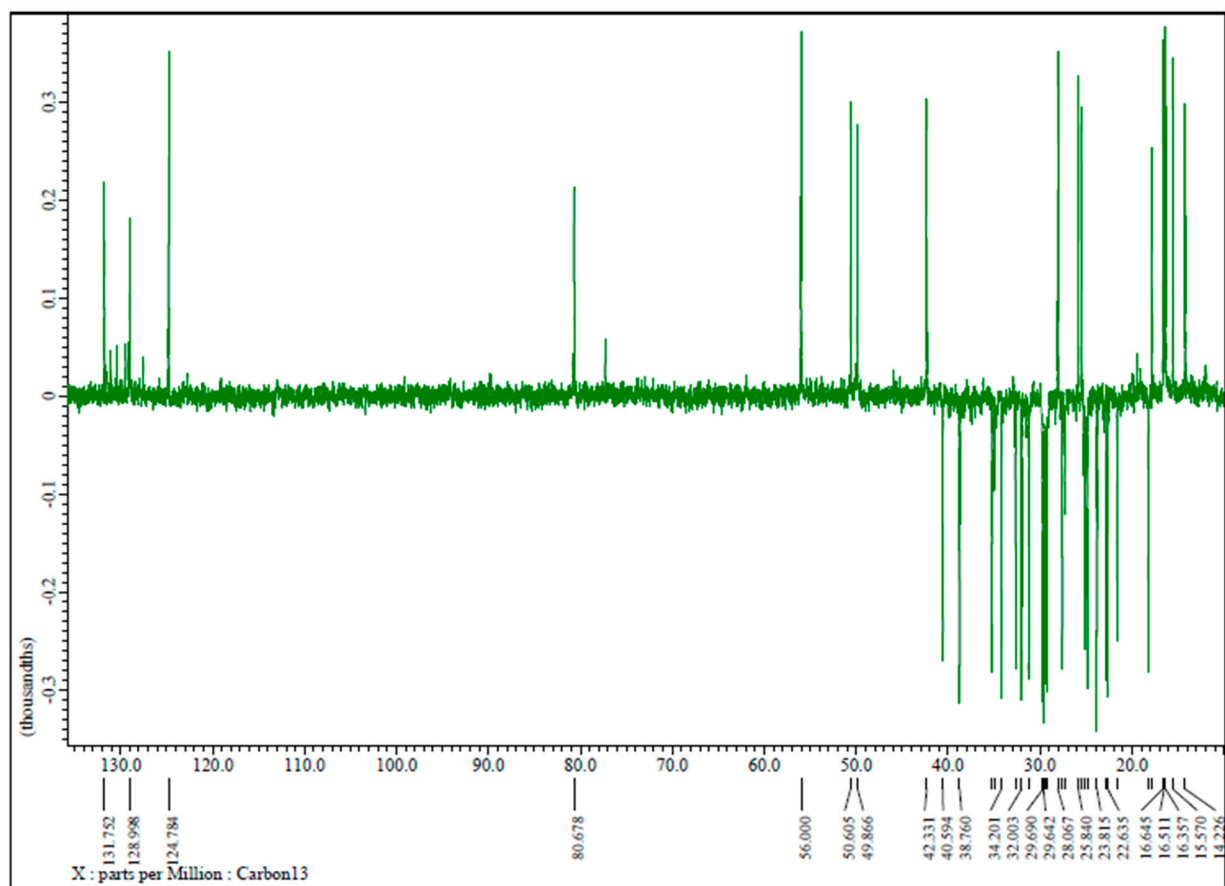

Figure S6. HMQC Spectrum of 1.

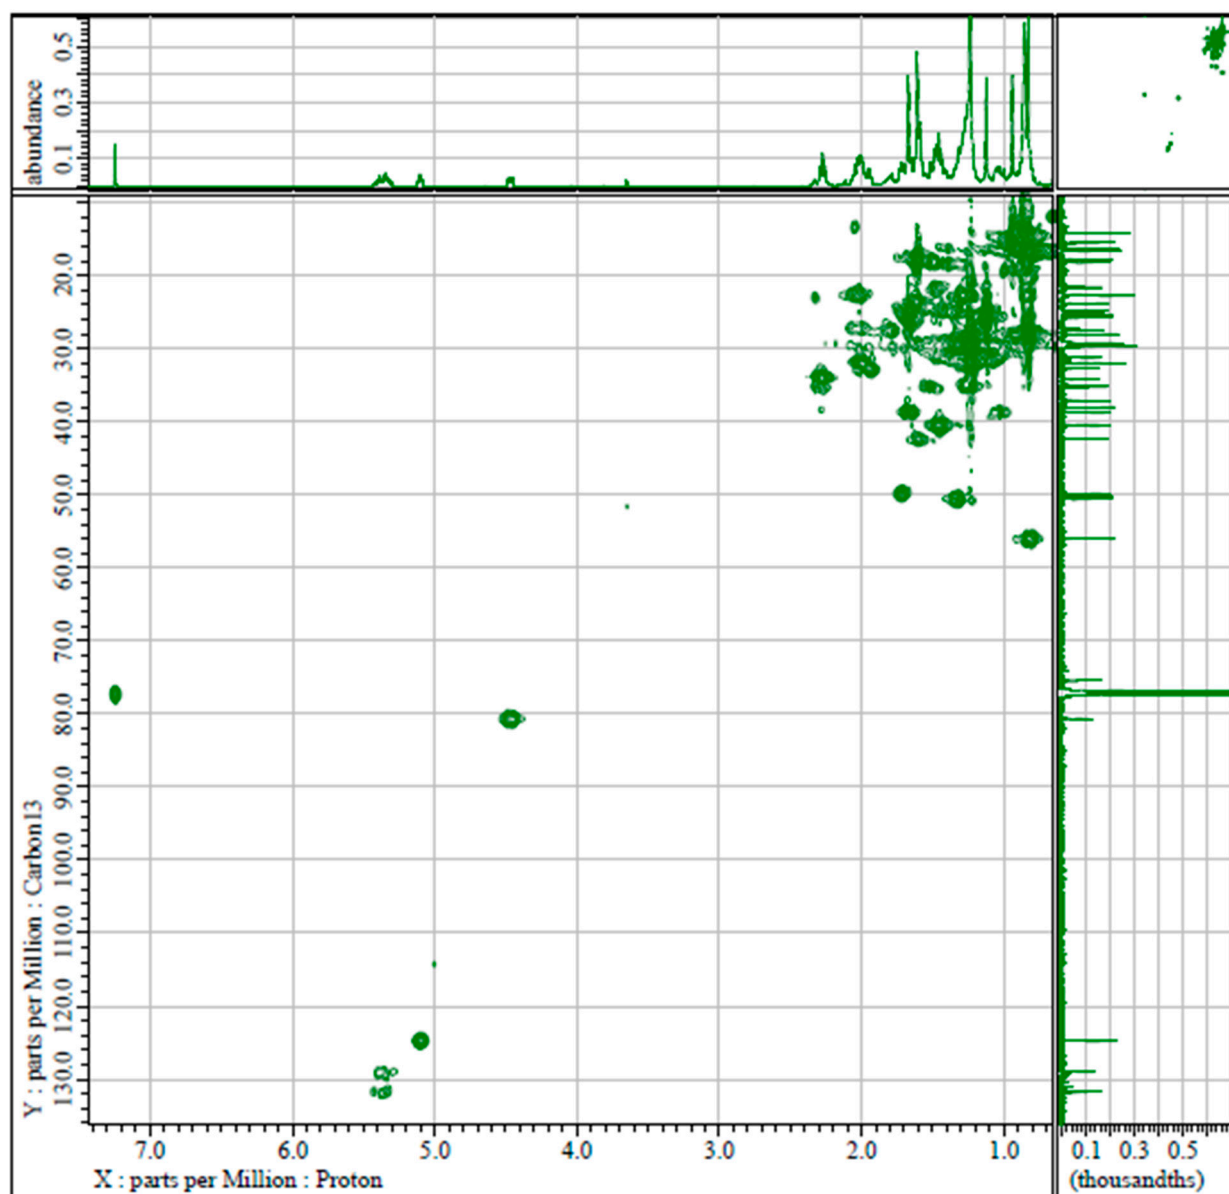

Figure S7. HMBC Spectrum of 1.

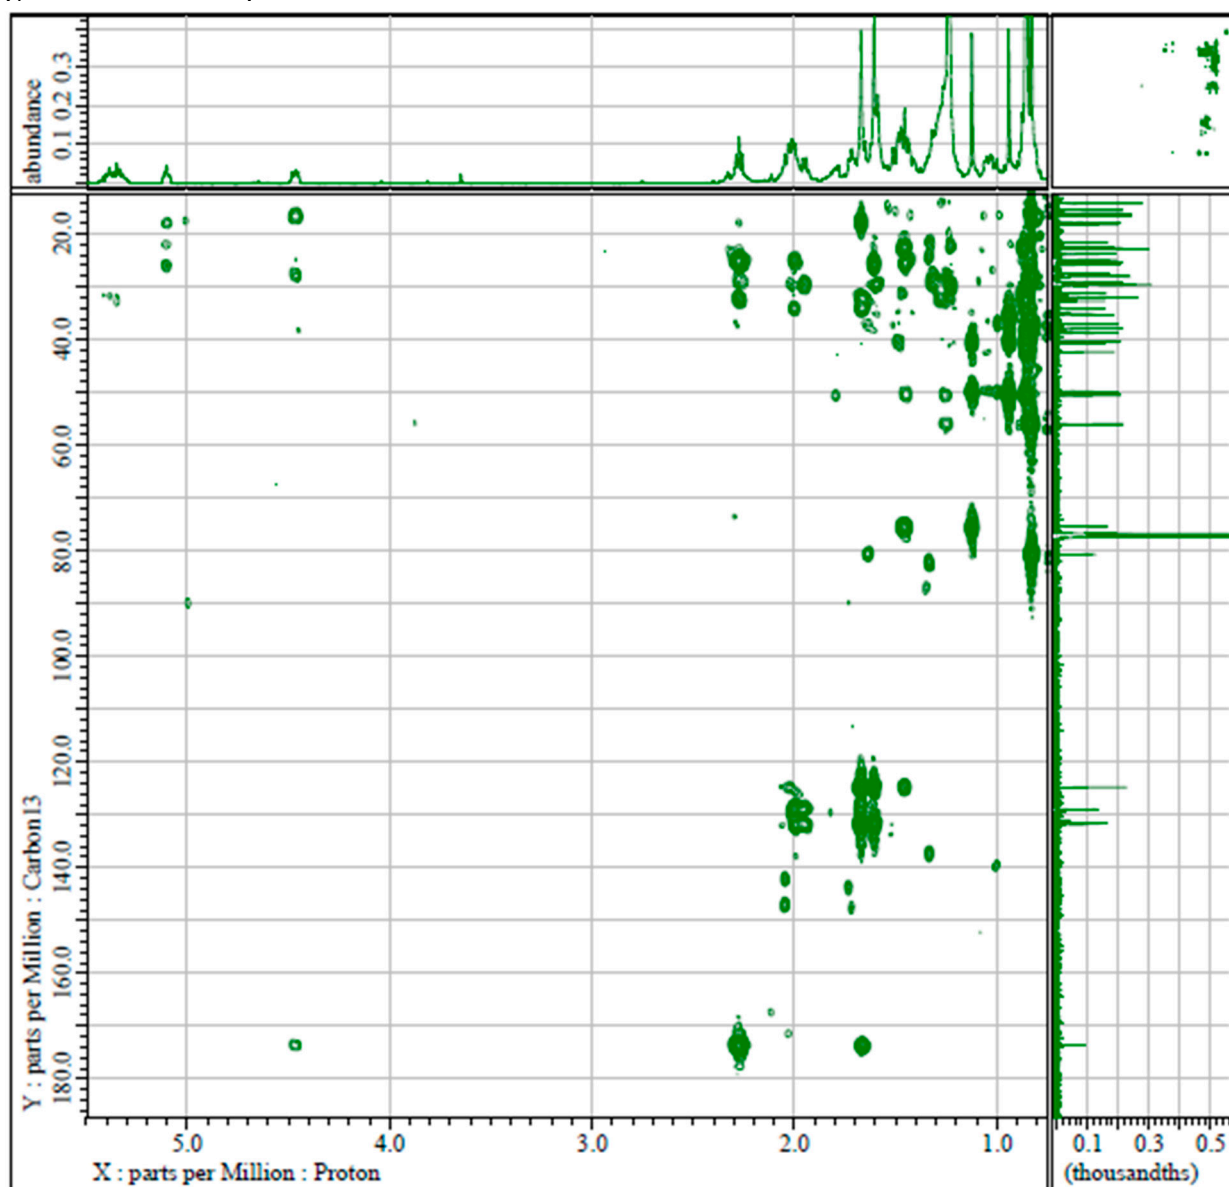

Figure S8.  $^1\text{H}$ - $^1\text{H}$ -COSY Spectrum of **1**.

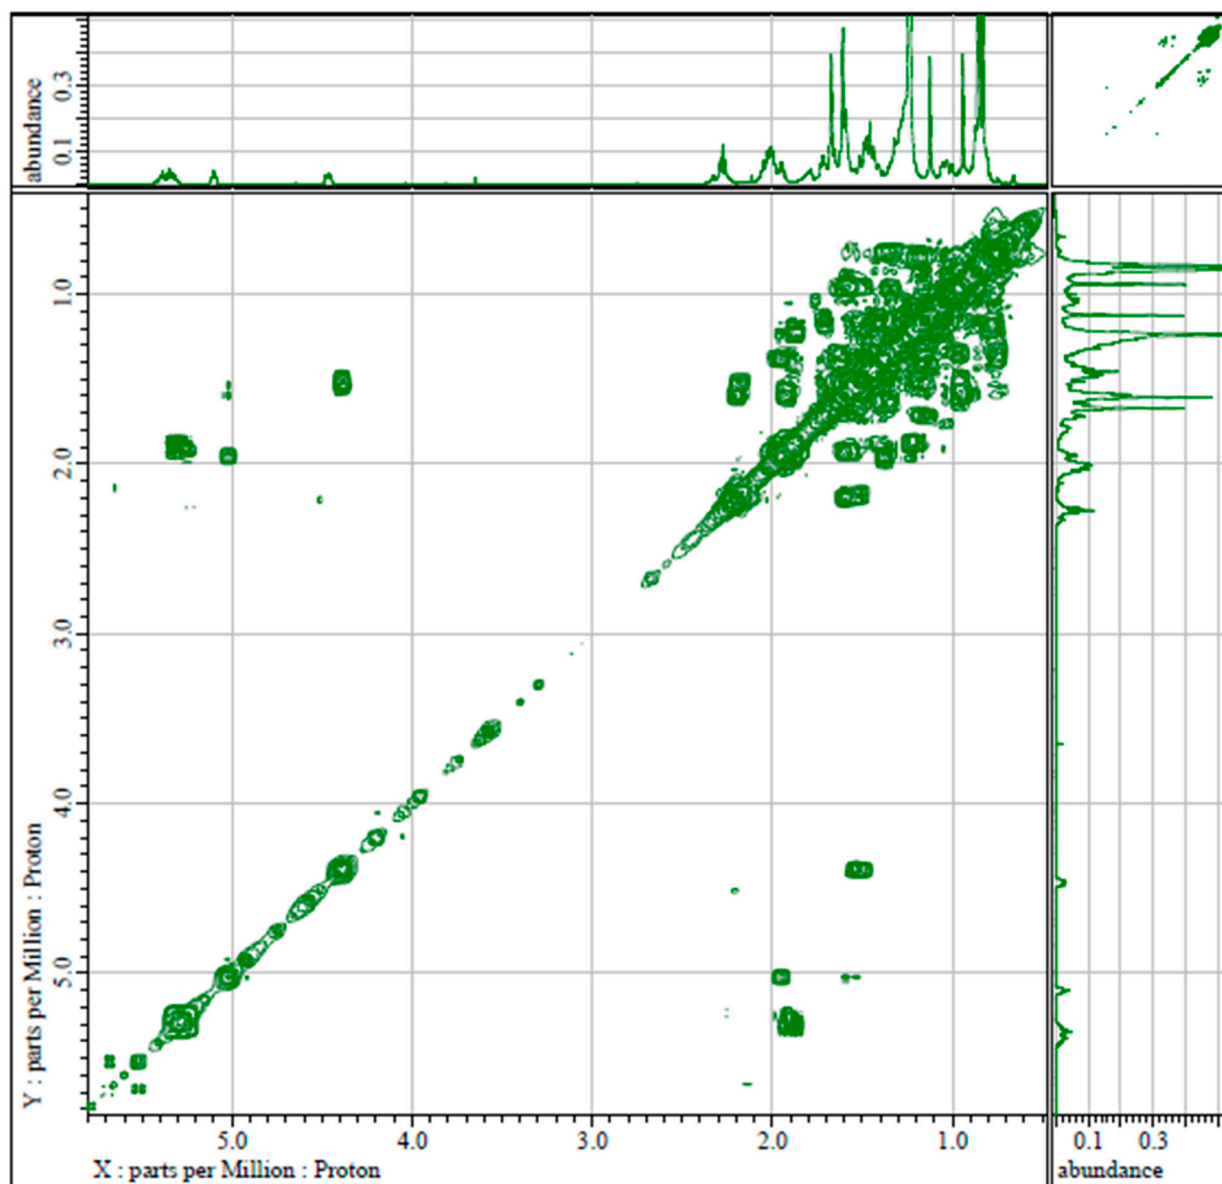

Figure S9. NOESY Spectrum of 1.

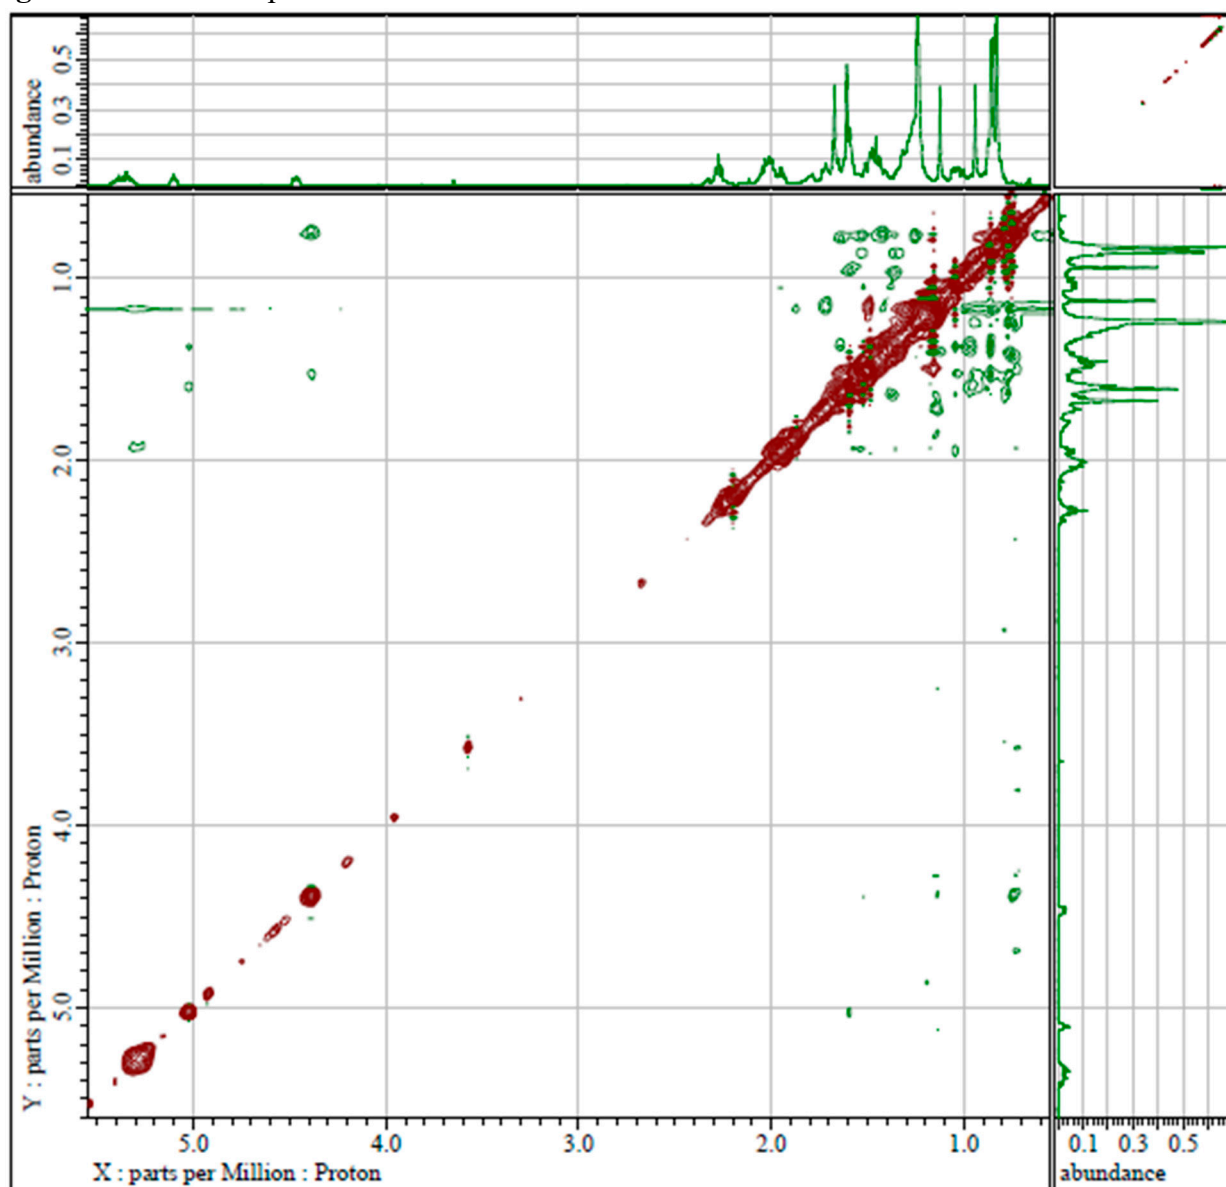

**Figure S10.** HRTOFMS Spectrum of **2**.

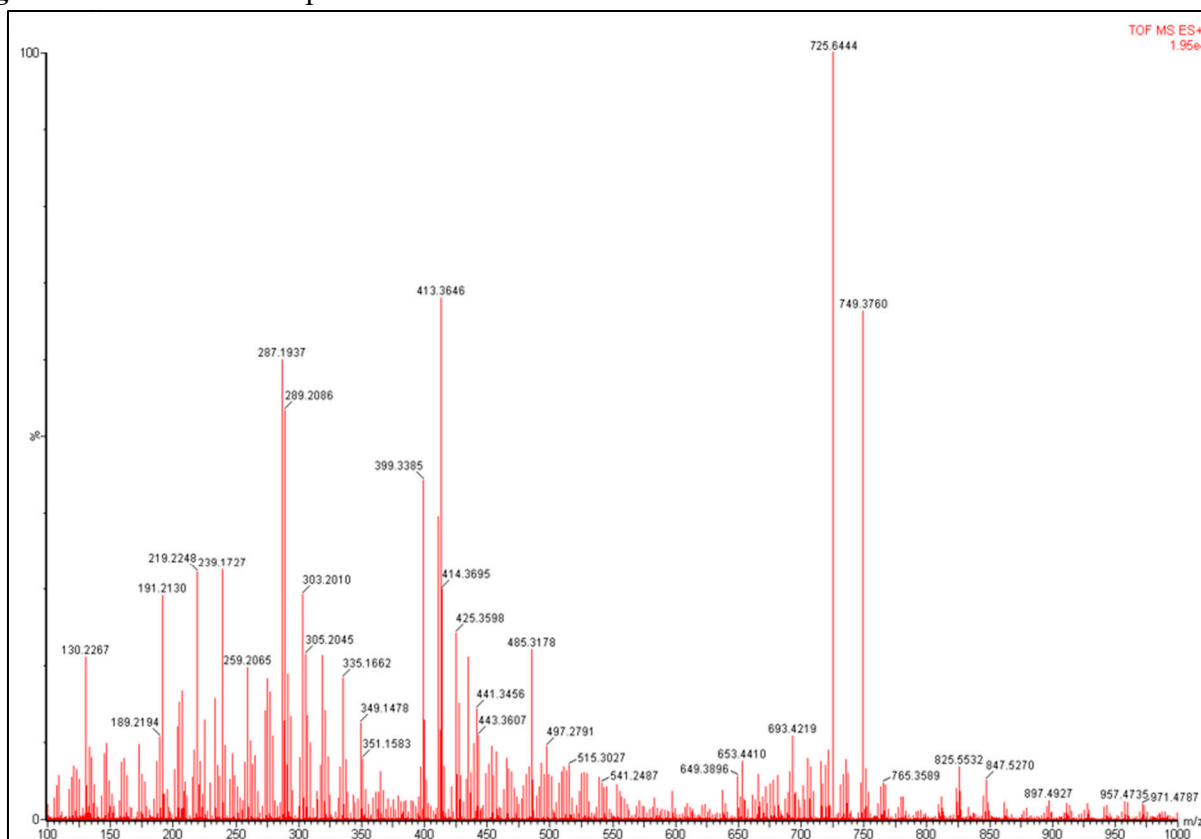

**Figure S11.** FTIR Spectrum of **2**.

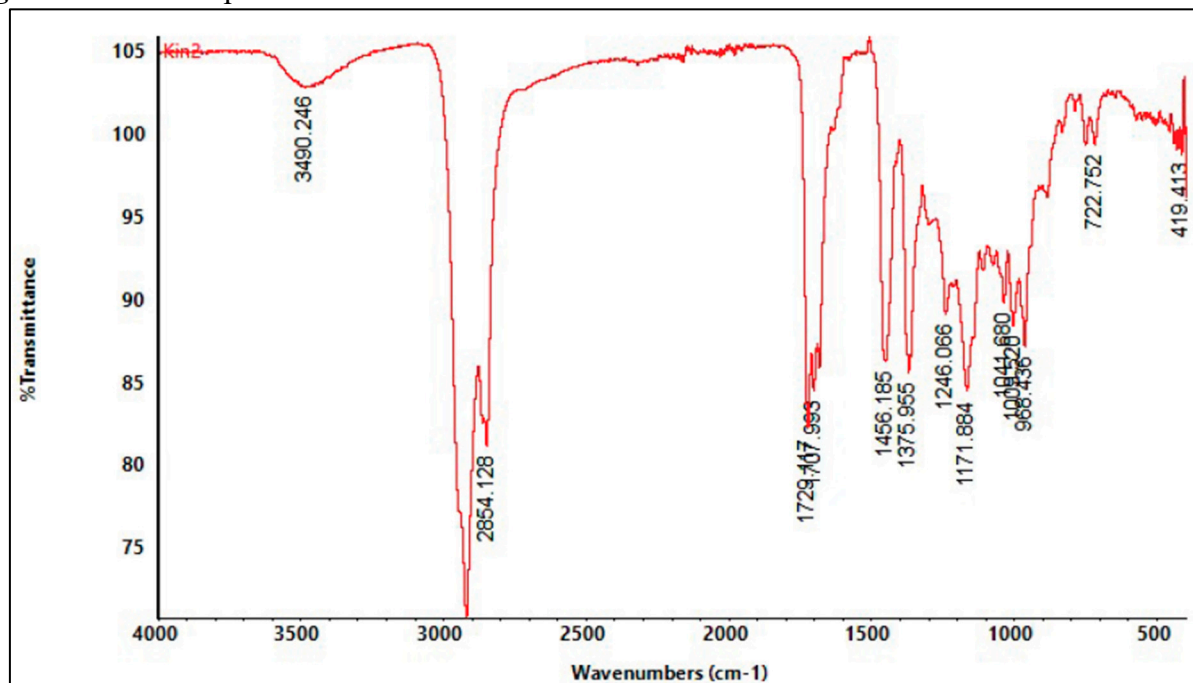

**Figure S12.**  $^1\text{H}$ -NMR Spectrum of **2** (500 MHz in  $\text{CDCl}_3$ ).

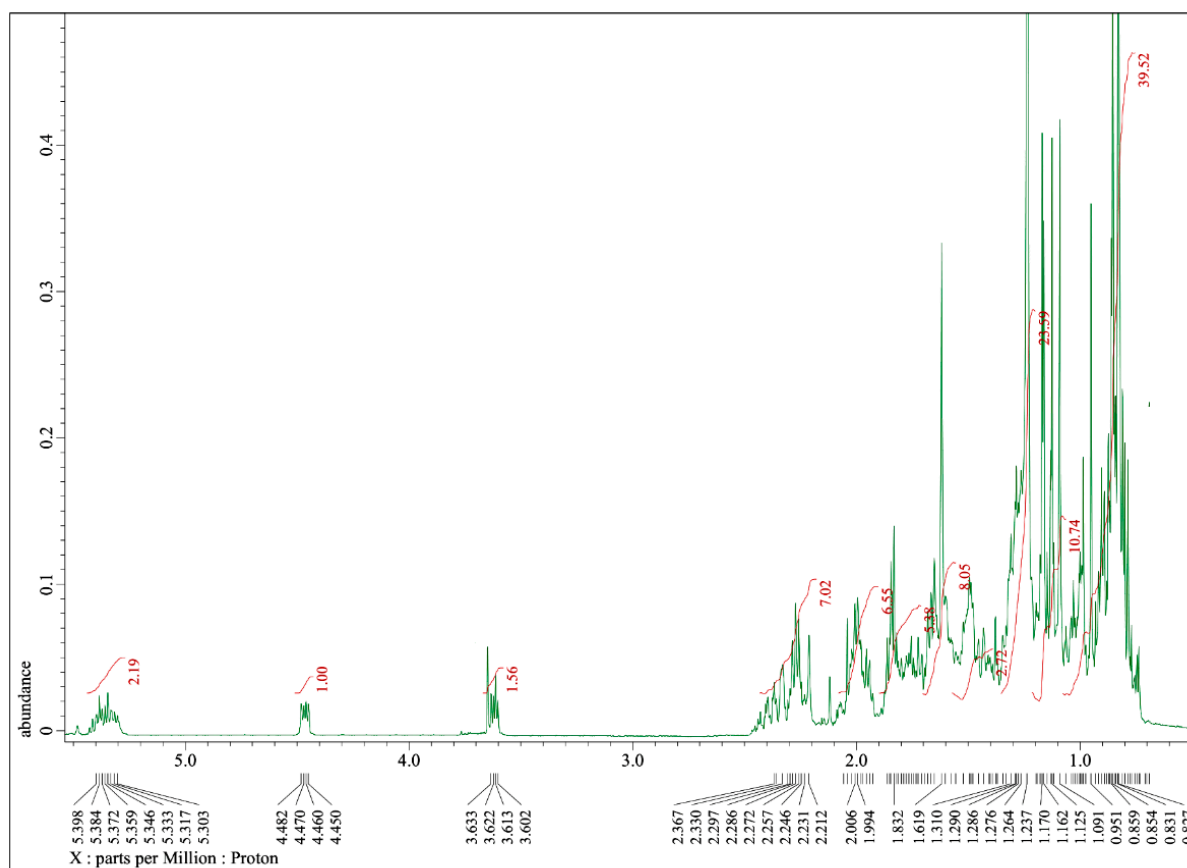

**Figure S13.**  $^{13}\text{C}$ -NMR Spectrum of **2** (125 MHz in  $\text{CDCl}_3$ ).

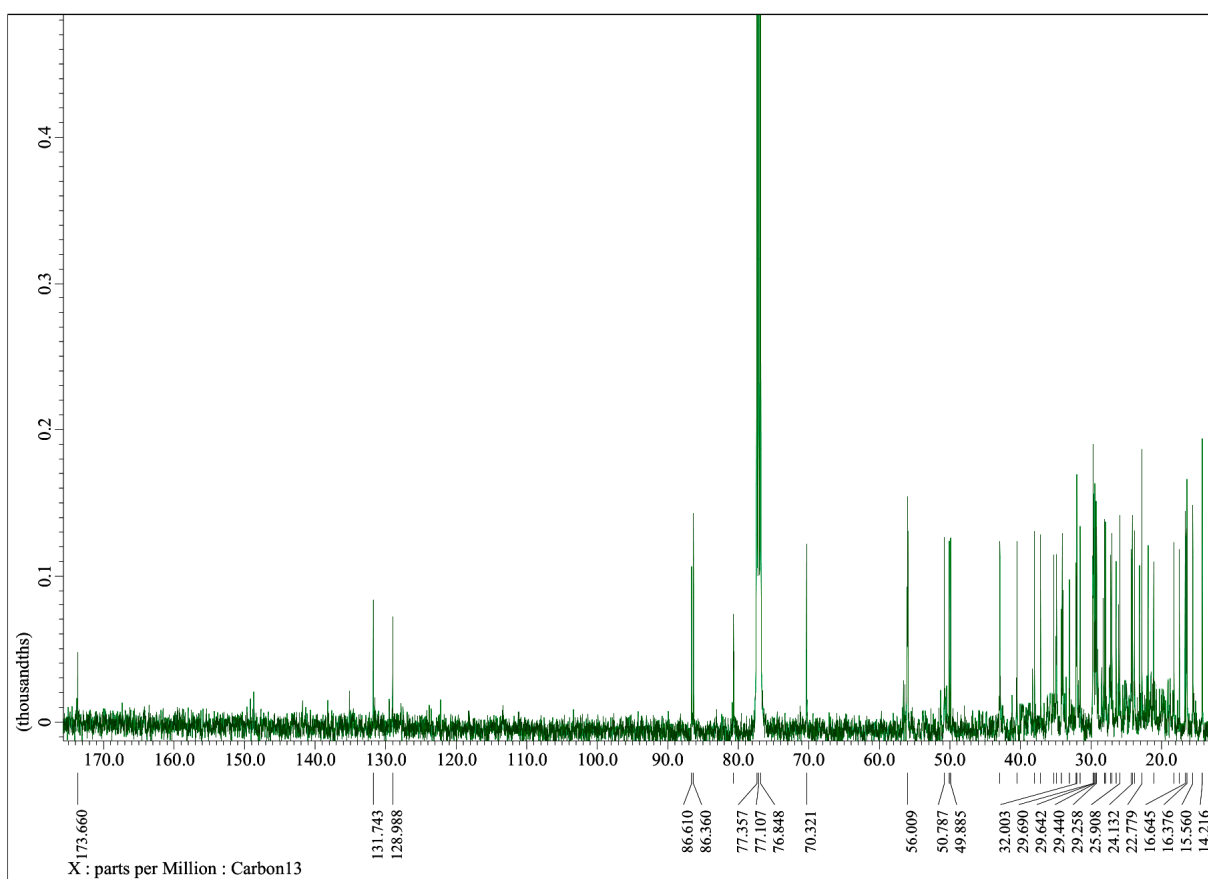



**Figure S14.** DEPT-135° Spectrum of **2** (125 MHz in CDCl<sub>3</sub>).

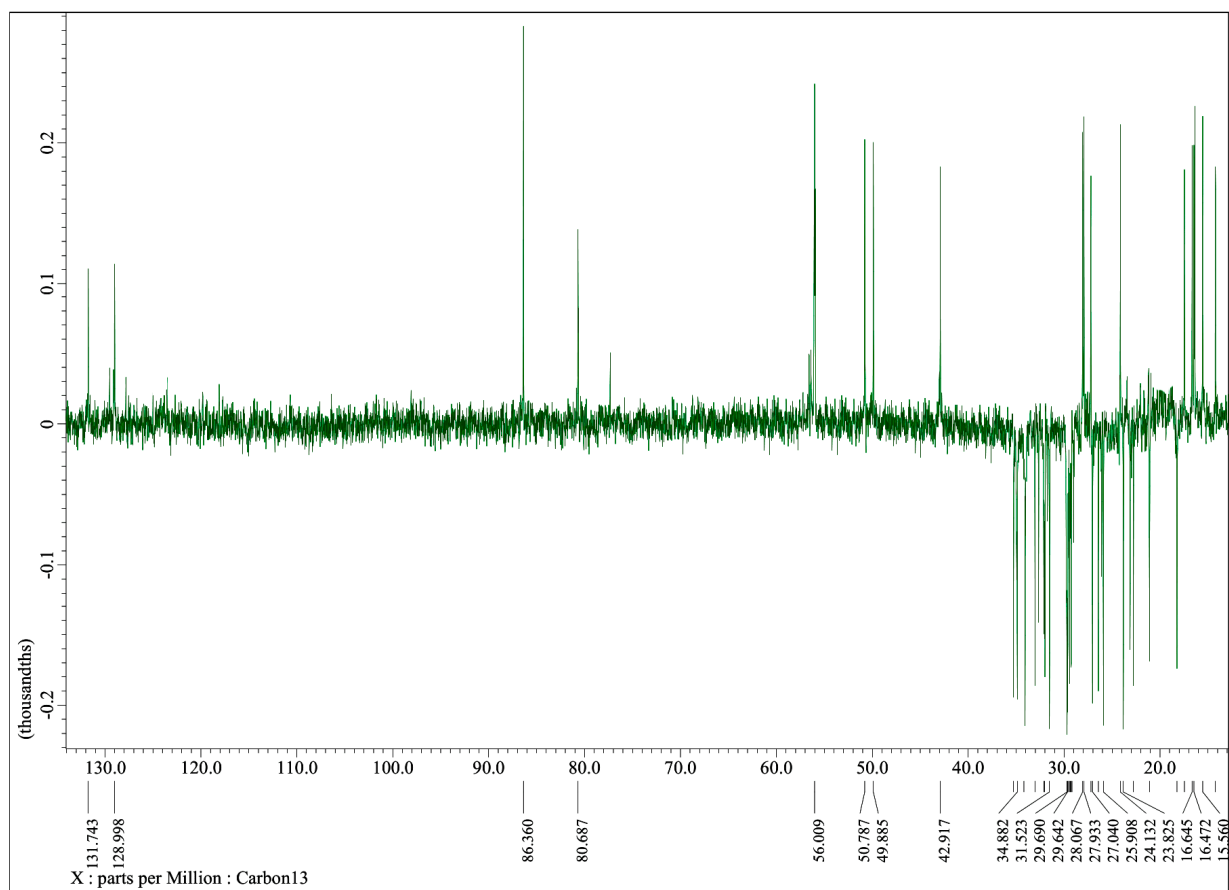

**Figure S15.** HMQC Spectrum of **2**.

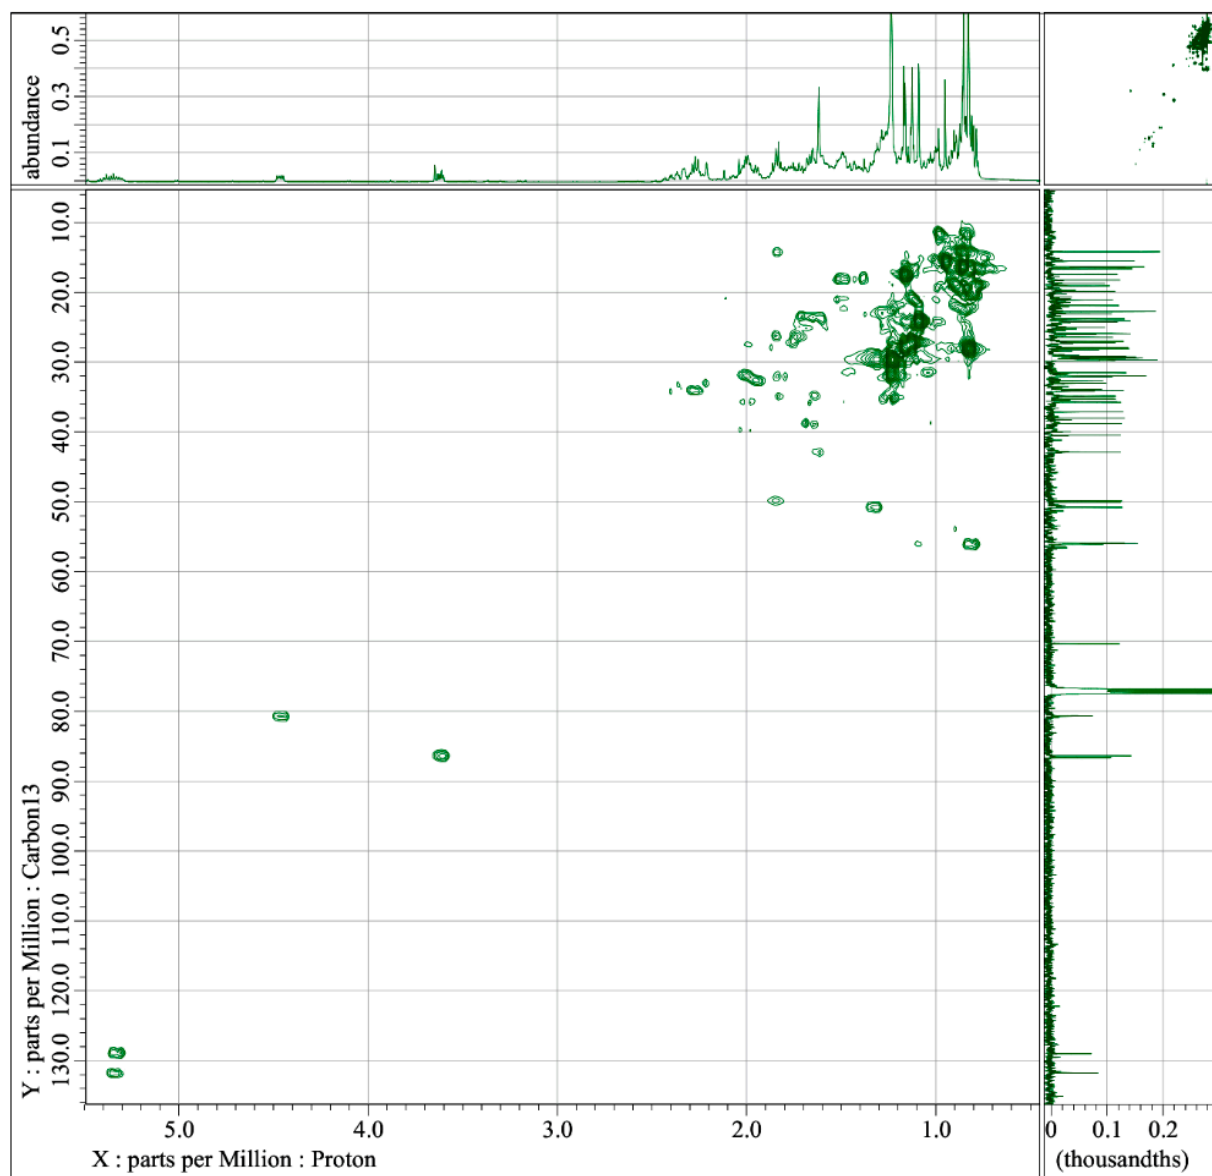

**Figure S16.** HMBC Spectrum of **2**.

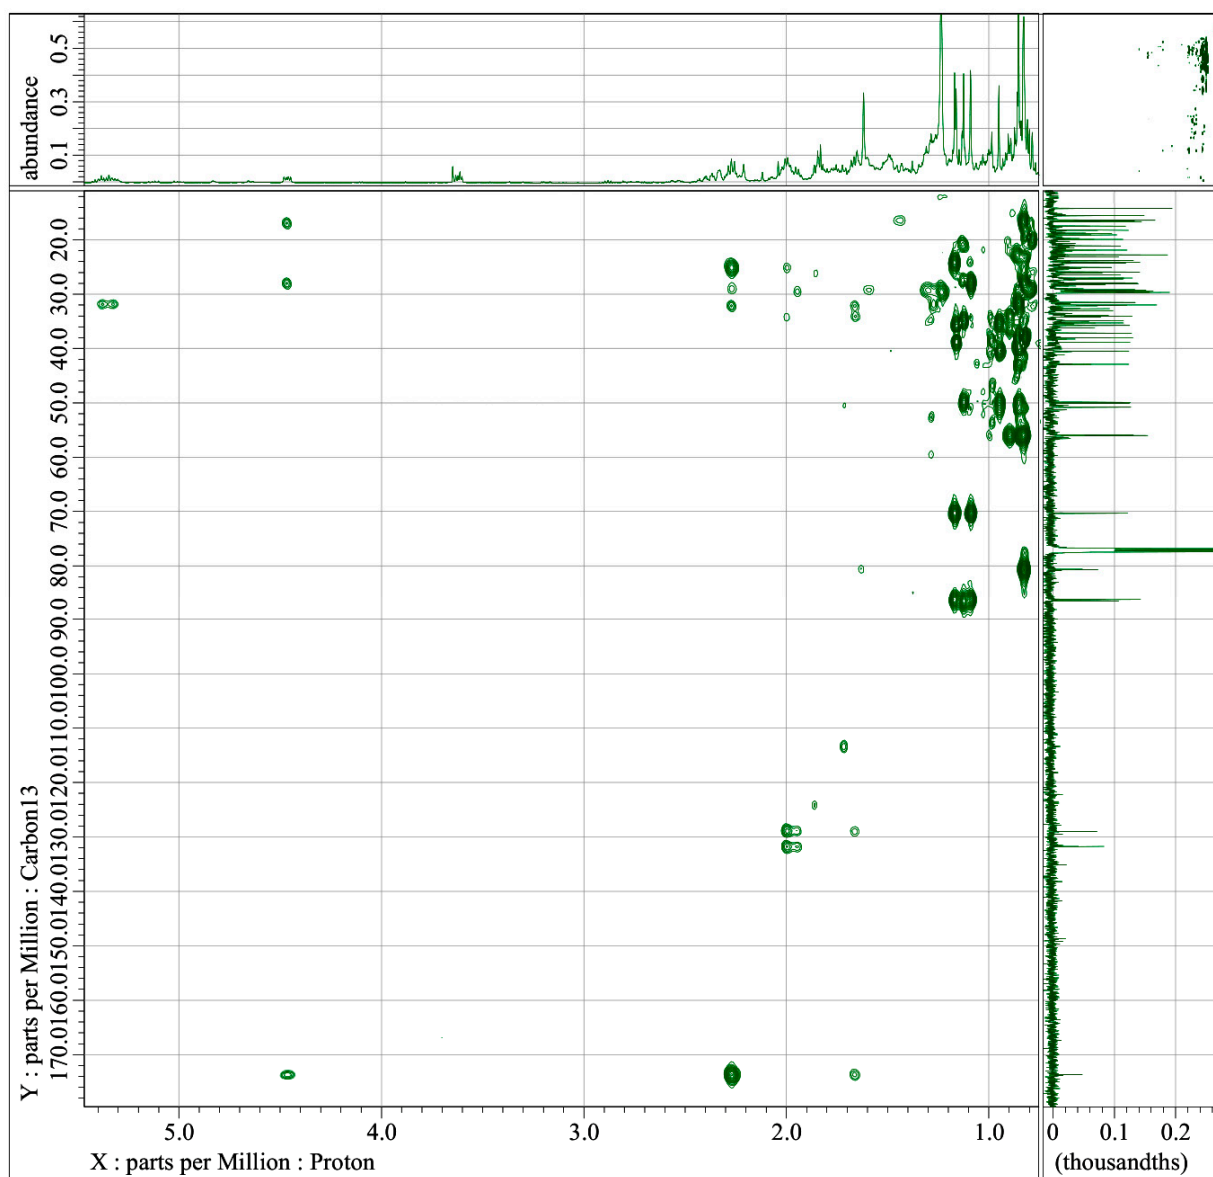

**Figure S17.**  $^1\text{H}$ - $^1\text{H}$ -COSY Spectrum of **2**.

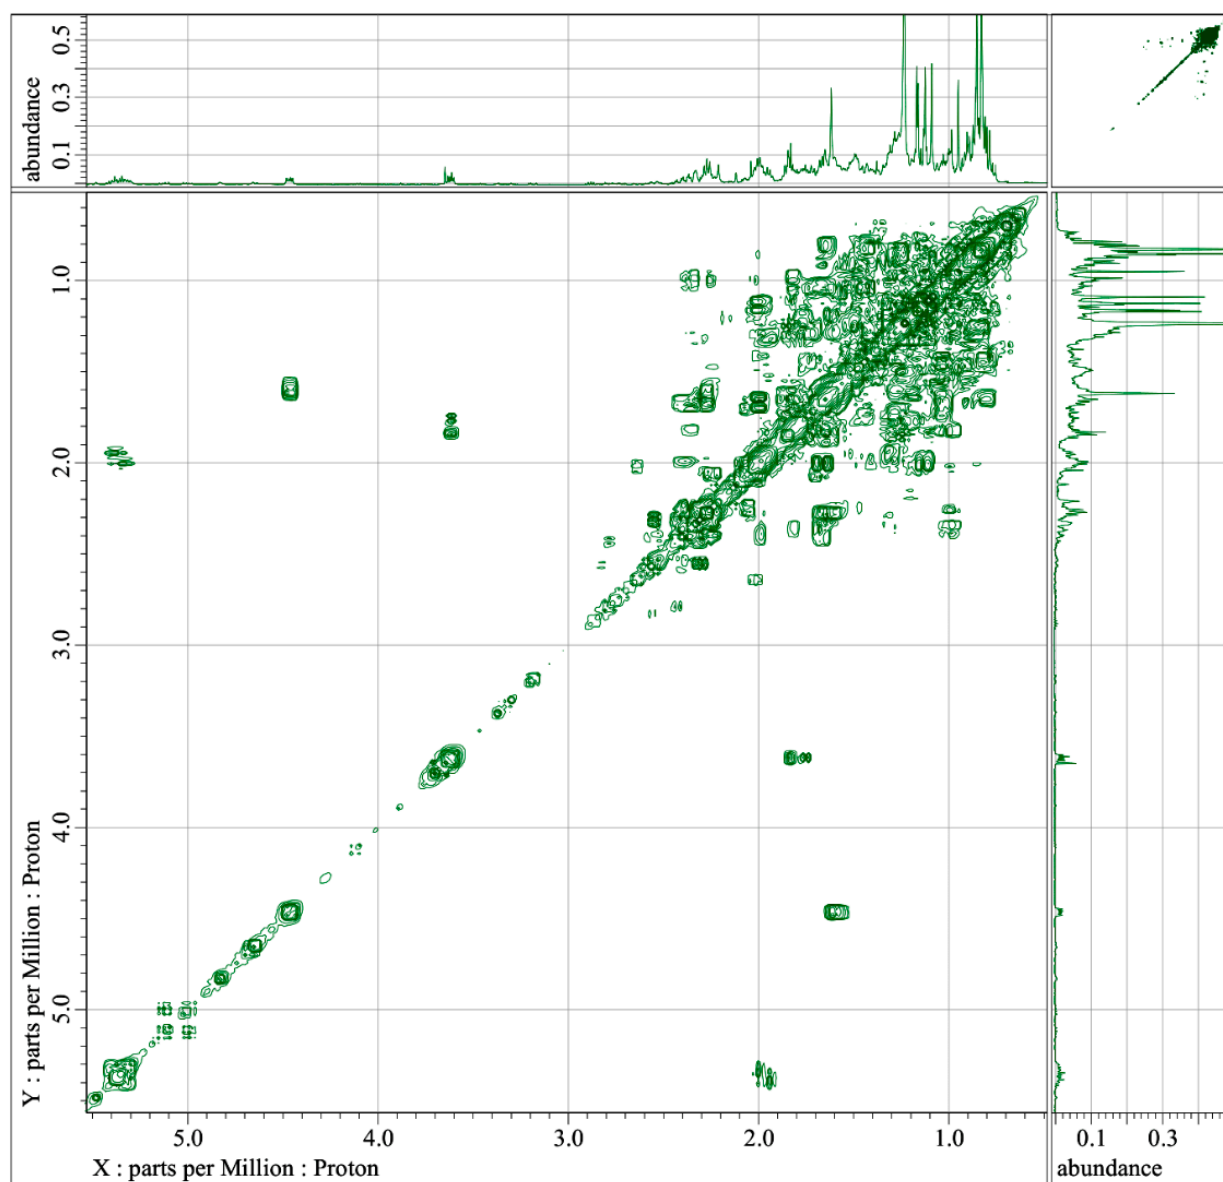

**Figure S18.** NOESY Spectrum of **2**.

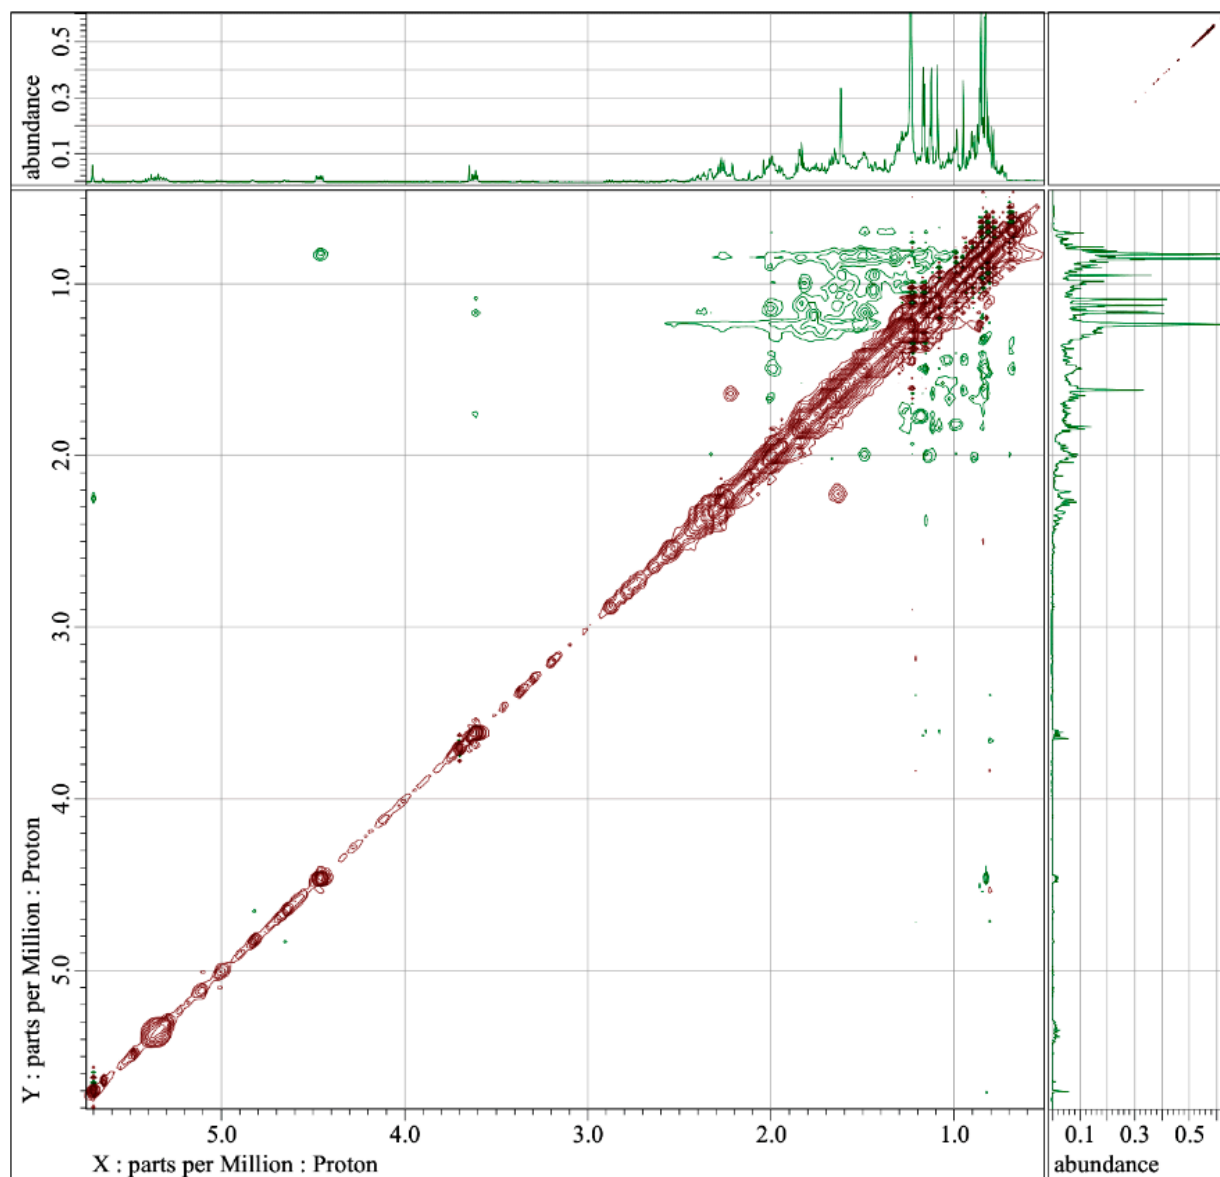

**Figure S19.** Results of cytotoxic activity of **1** against MCF-7 cell line.

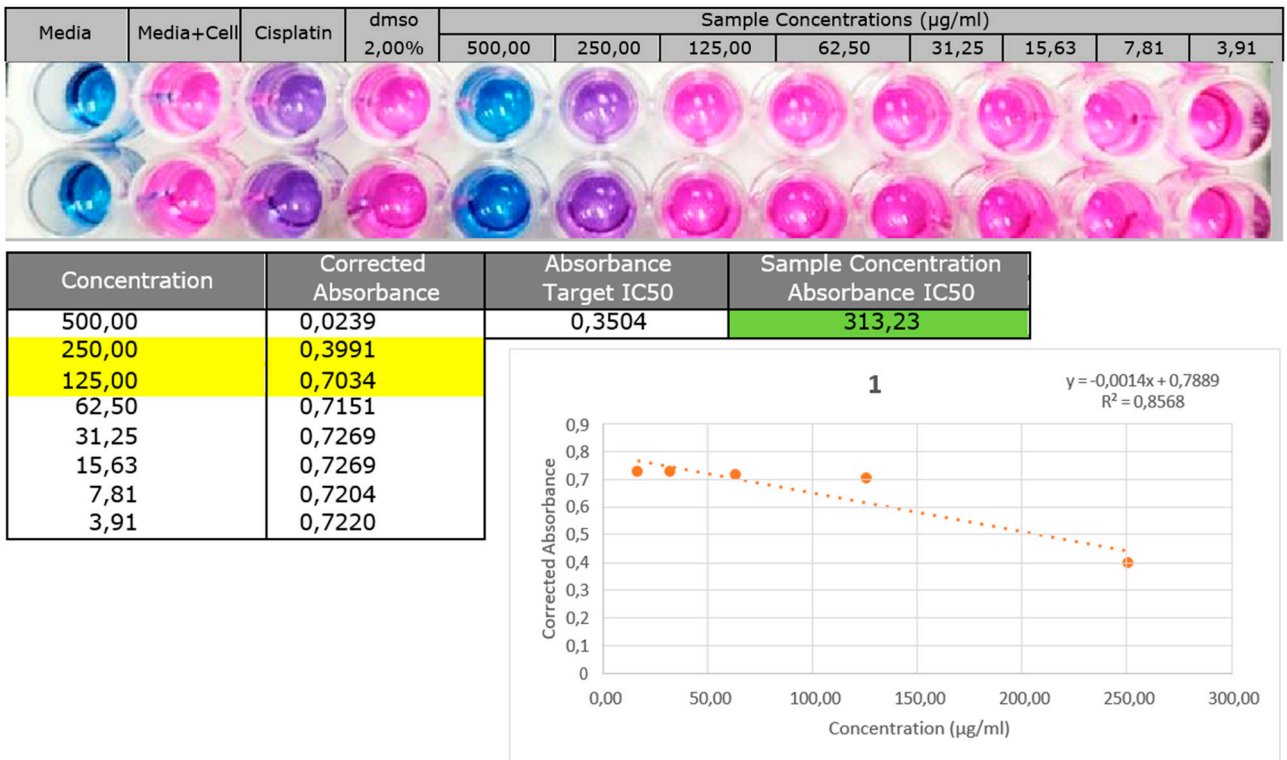

**Figure S20.** Results of cytotoxic activity of **2** against MCF-7 cell line.

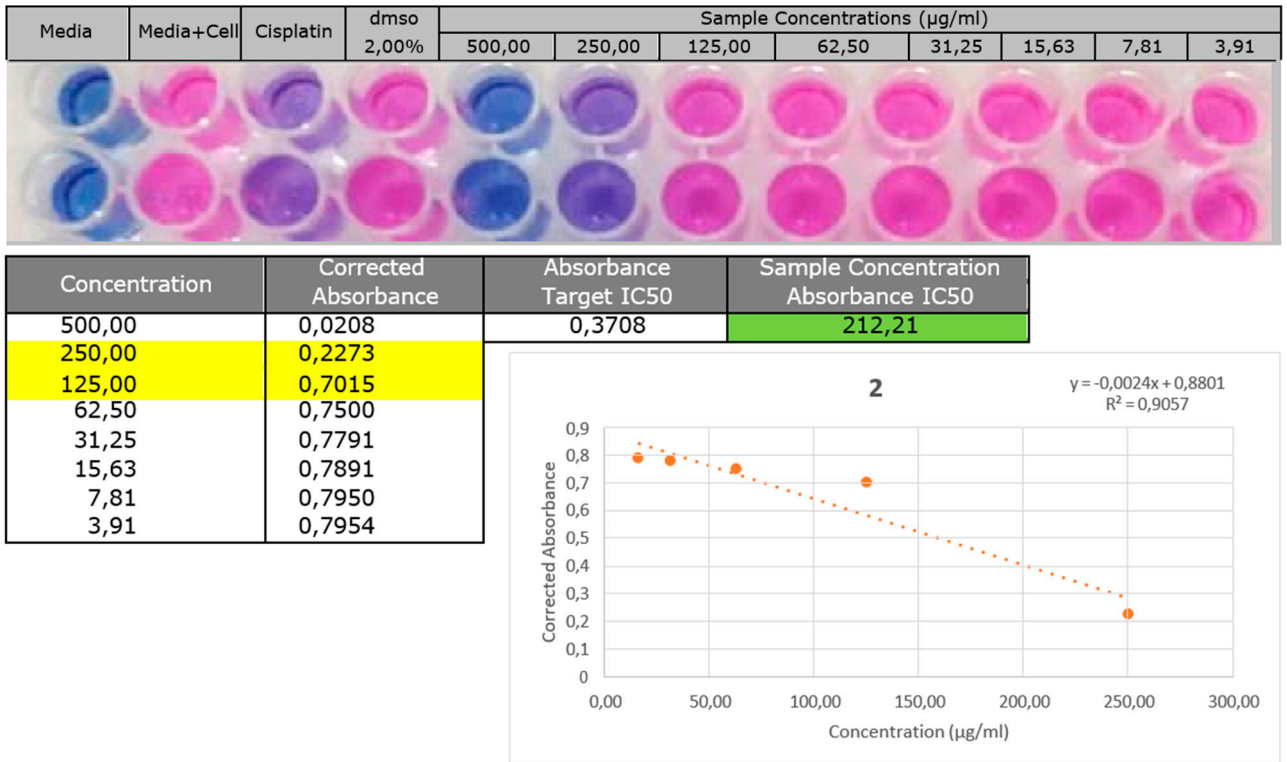

**Figure S21.** Results of cytotoxic activity of **3** against MCF-7 cell line.

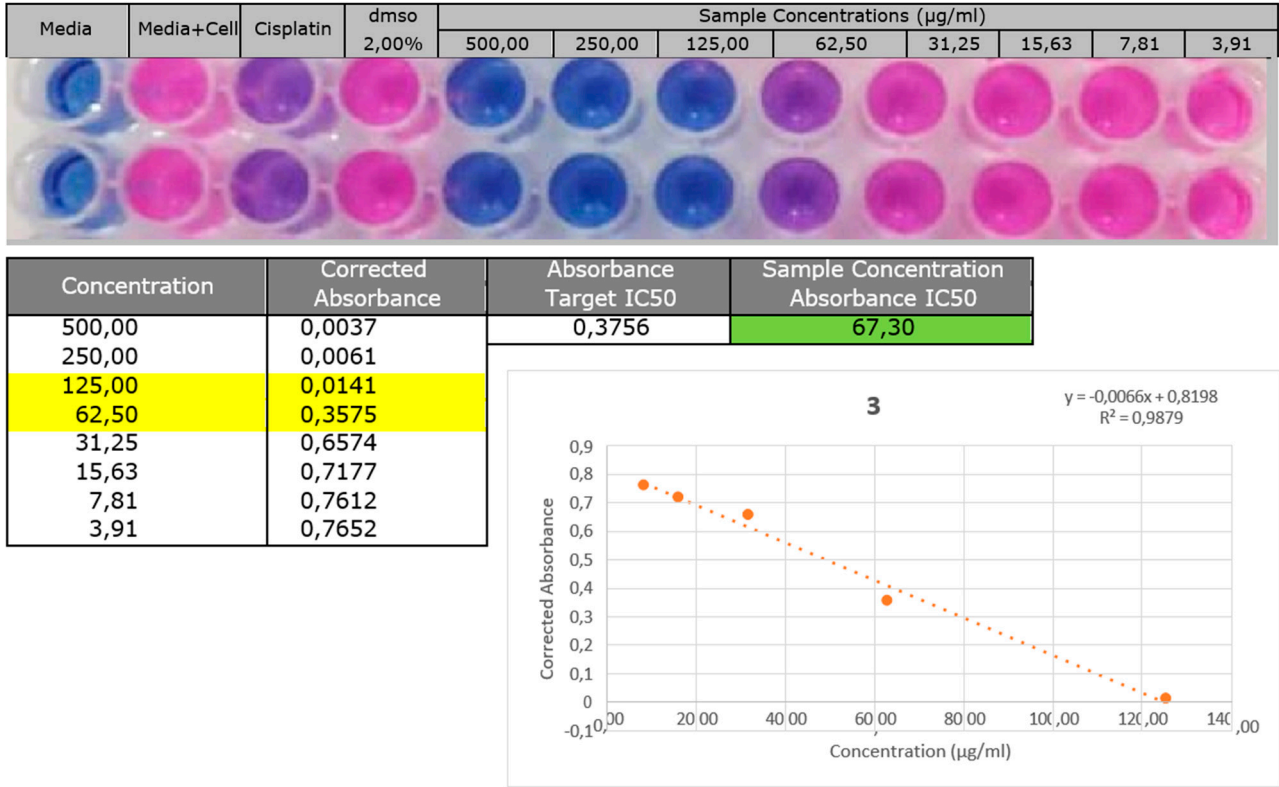

**Figure S22.** Results of cytotoxic activity of **4** against MCF-7 cell line.

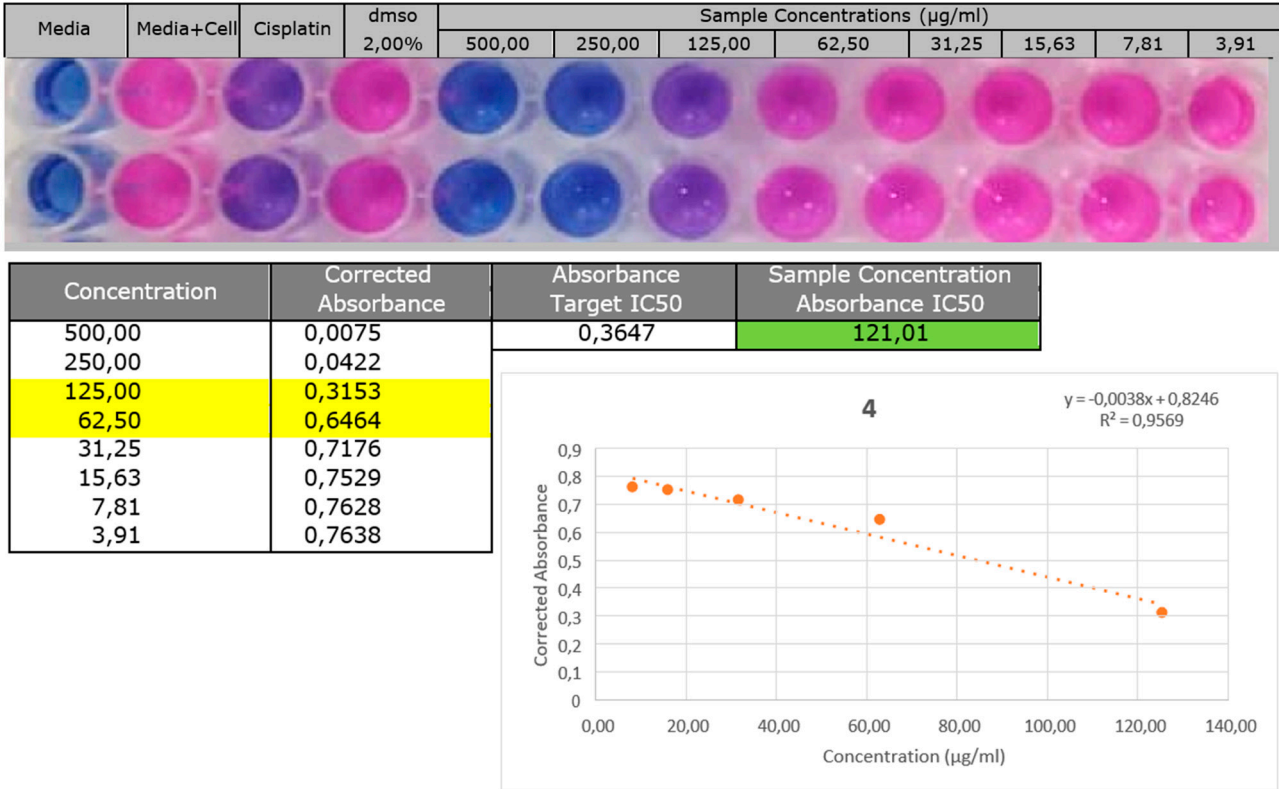



**Figure S23.** Results of cytotoxic activity of **5** against MCF-7 cell line.

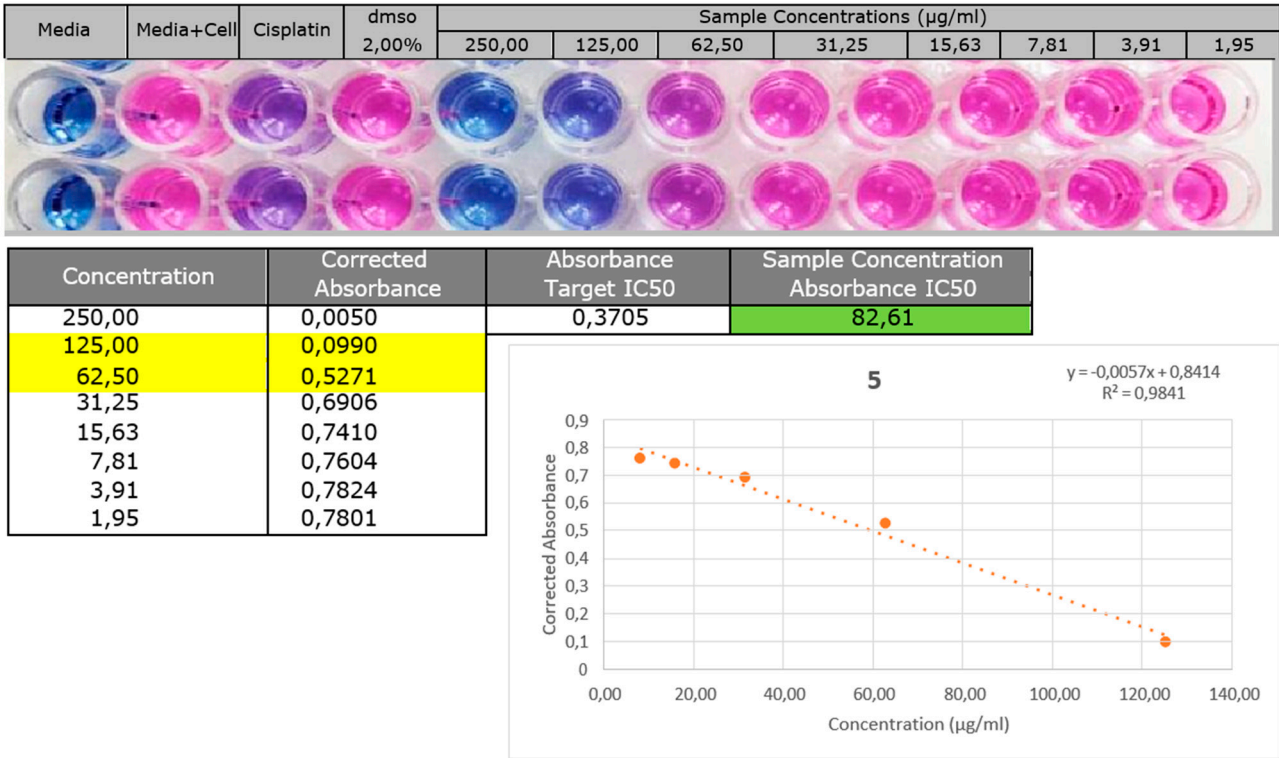

**Figure S24.** Results of cytotoxic activity of **1** against B16-F10 cell line.

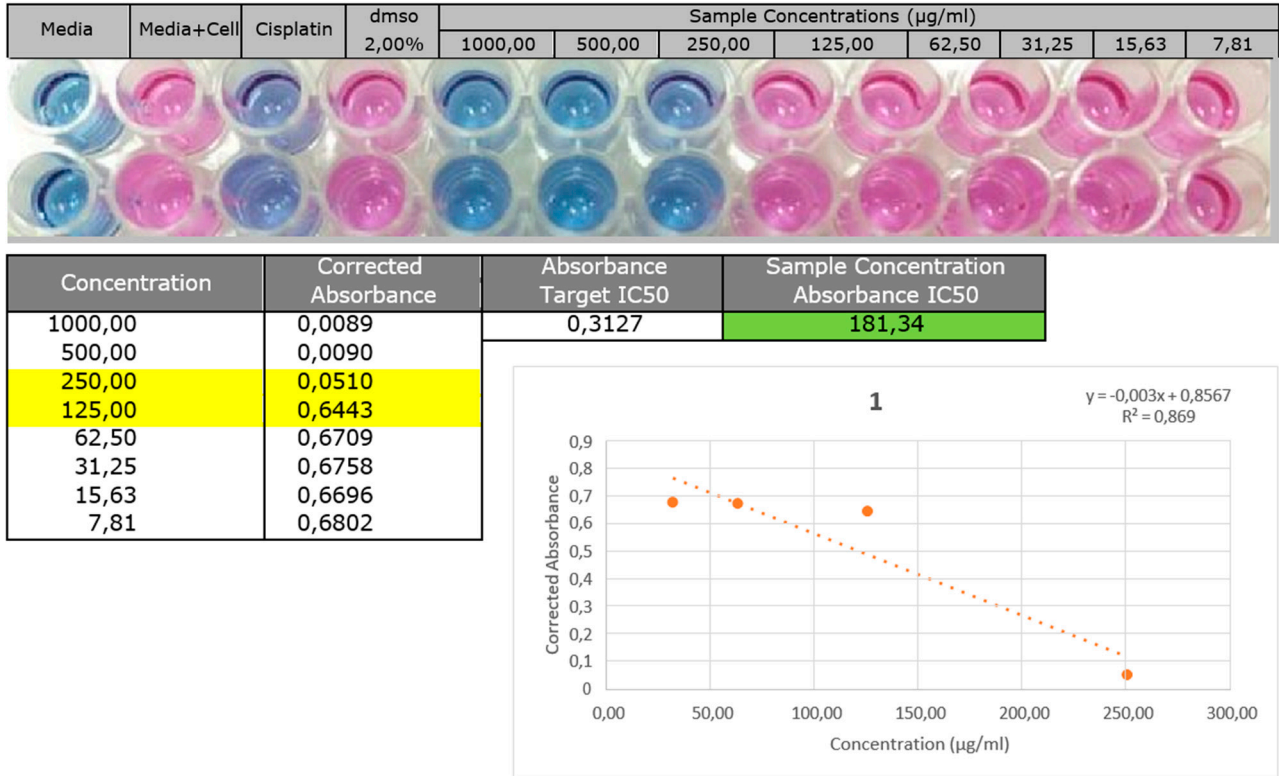



**Figure S25.** Results of cytotoxic activity of **2** against B16-F10 cell line.

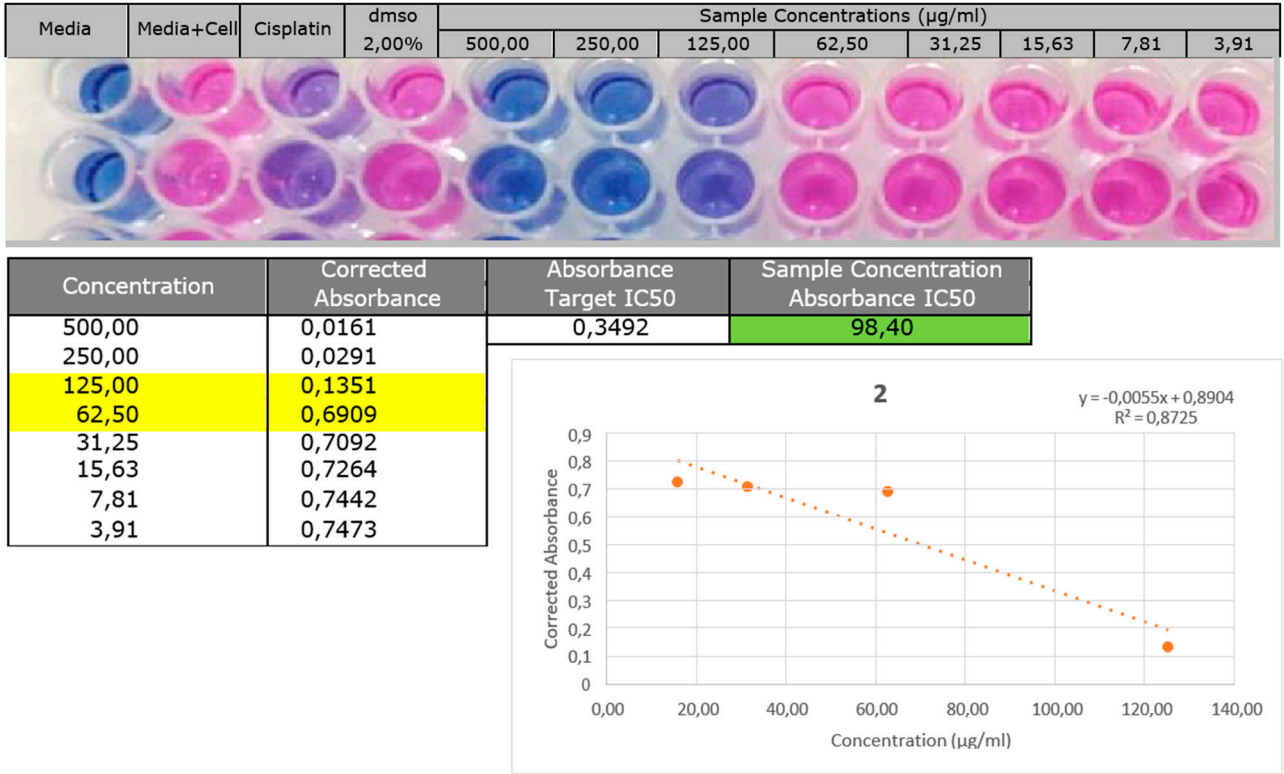

**Figure S26.** Results of cytotoxic activity of **3** against B16-F10 cell line.

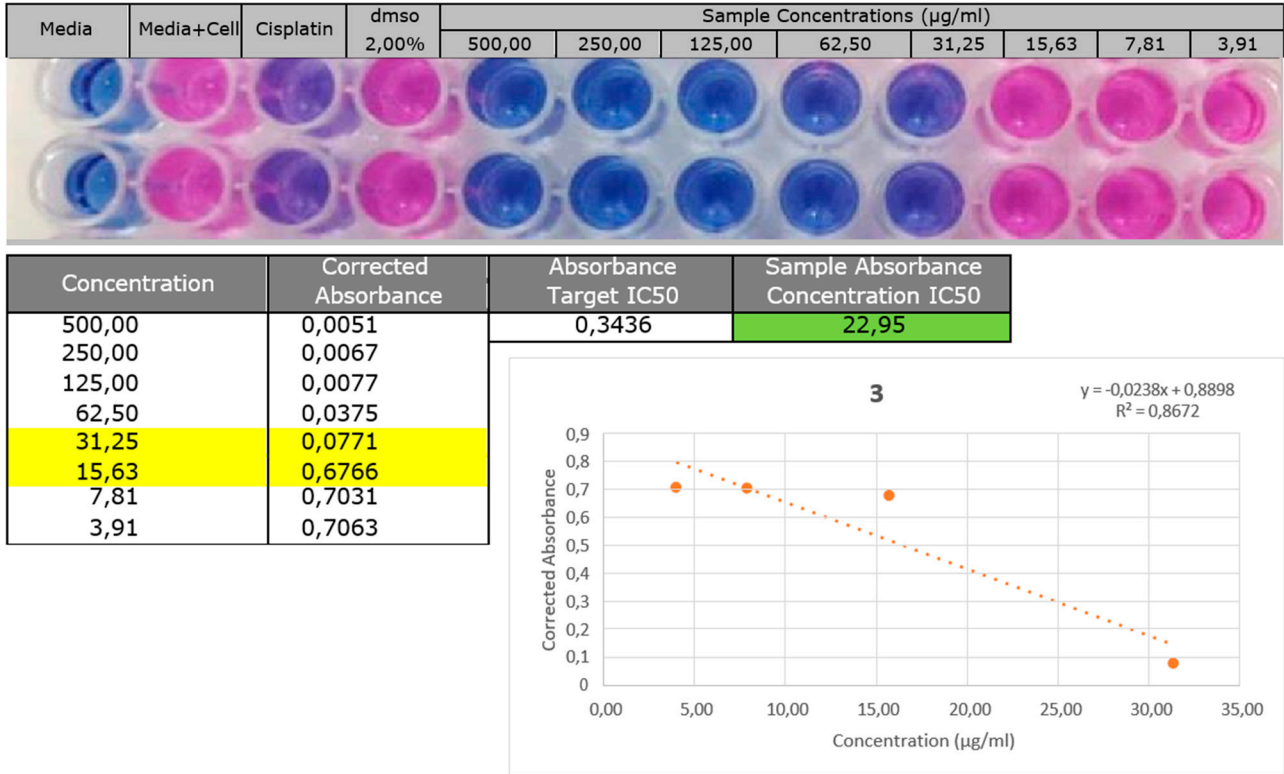

**Figure S27.** Results of cytotoxic activity of **4** against B16-F10 cell line.

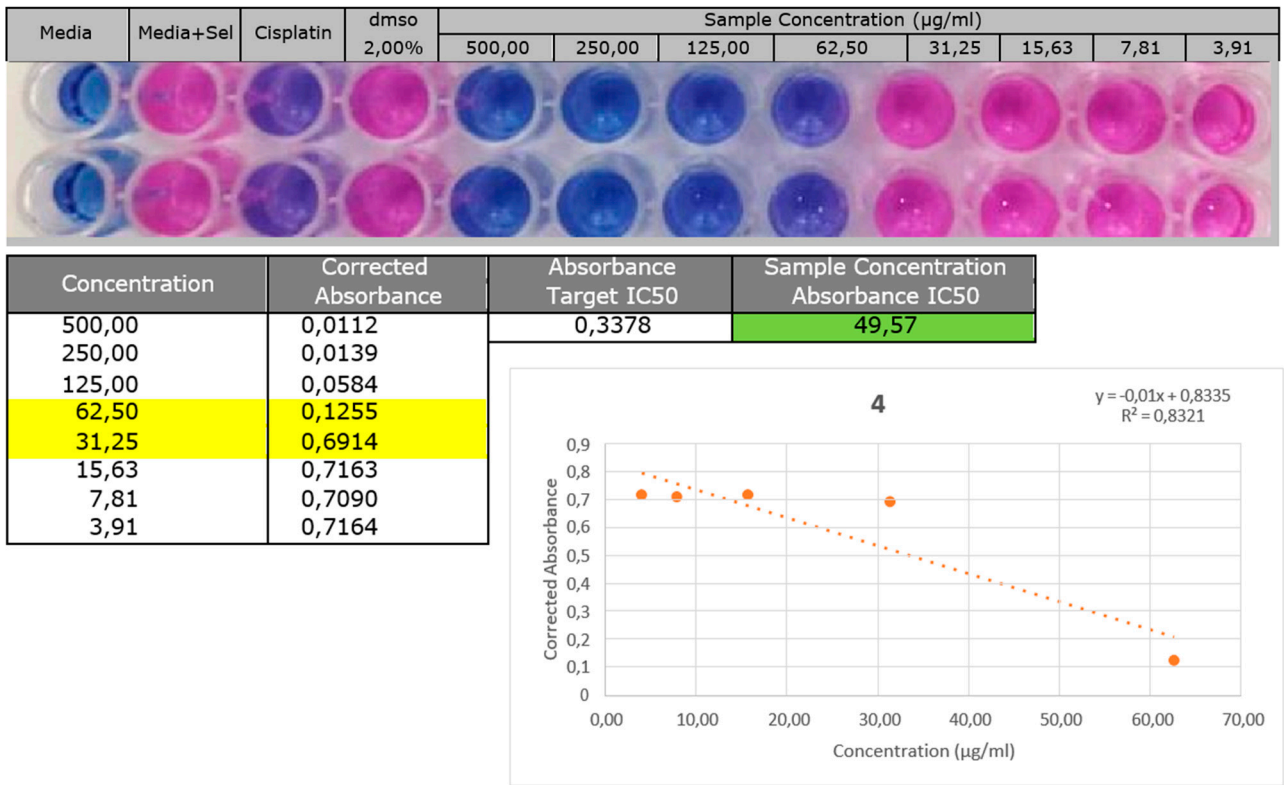

**Figure S28.** Results of cytotoxic activity of **5** against B16-F10 cell line.

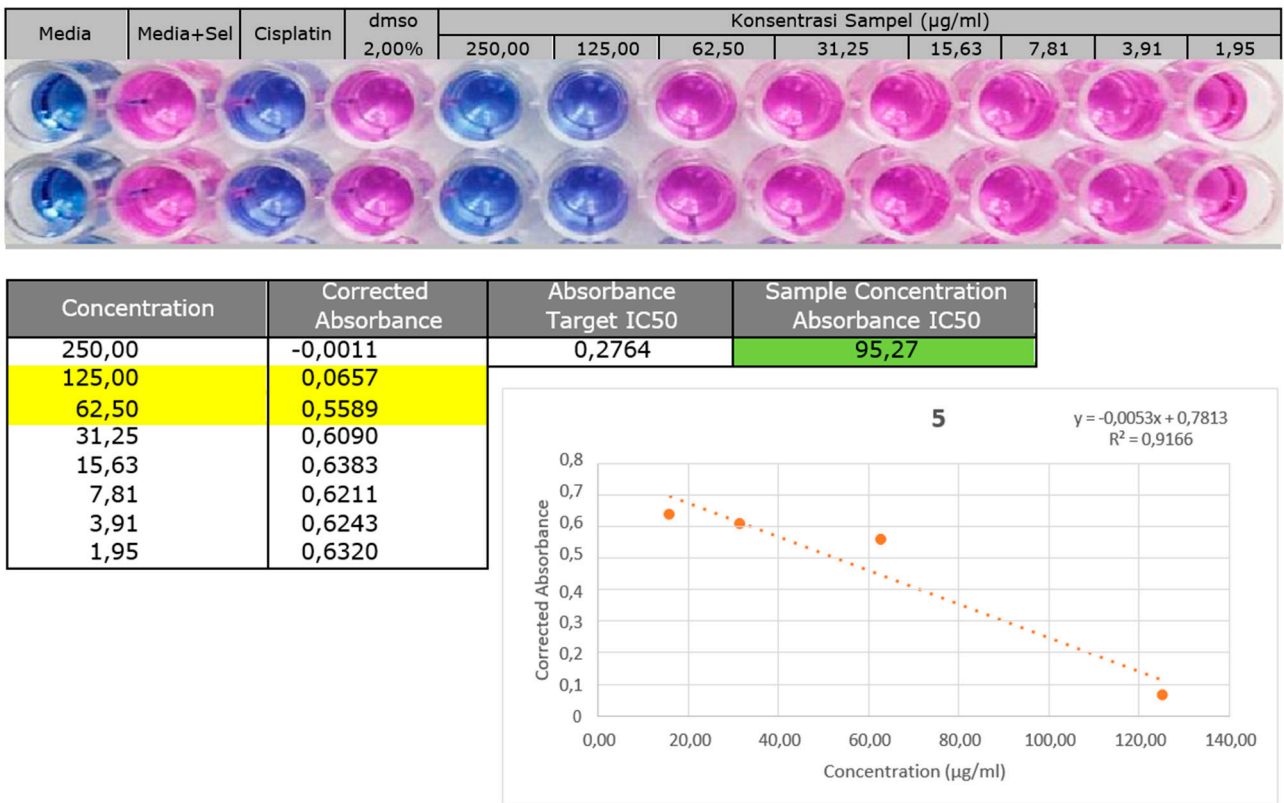

Supplement: s1 [file s1]
